# Supplementary material for: High-Throughput Sequencing and Copy Number Variation Detection Using Formalin Fixed Embedded Tissue in Metastatic Gastric Cancer
Source: PLoS One. 2014 Nov 5;9(11):e111693. doi: 10.1371/journal.pone.0111693 (PMC4221102; doi:10.1371/journal.pone.0111693)
Supplement: Table S2 — The concentrations of DNAs, their concentration fold, average coverage of the samples, total numbers of bases, >Q20 bases, reads, mean read length, mapped reads, on-target rate (%), mean depth and uniformity. (XLS) [file pone.0111693.s004.xls]

## Sheet: Sheet1
No	concentration(ng/㎕)		Conc. Fold	DNA type	Barcode	Average Coverage
	Qubit	Nanodrop					Bases	>=Q20 Bases	Reads	Mean Read Length	Mapped Reads	On Target	Mean Depth	Uniformity
1	61.6	272.8	4.42857	FFPE	11	1227	32058337	29560260	293154	109 bp	290753	0.9154	1227	0.9007
2	88.2	1220	13.8322	FFPE	32	1641	42899149	39128742	406667	105 bp	403304	0.9032	1641	0.8995
3	82.8	670.8	8.10145	FFPE	33	1259	33600242	30961257	322364	104 bp	320575	0.8774	1259	0.936
4	85.4	602.1	7.05035	FFPE	39	1487	37889263	35104506	352995	107 bp	351358	0.9317	1487	0.9048
5	57.8	523.5	9.05709	FFPE	50	1854	48384064	44576168	445378	108 bp	442309	0.9233	1854	0.9589
6	74.8	624.4	8.34759	FFPE	51	1148	30360466	28023168	284777	106 bp	282907	0.896	1148	0.9343
7	70.2	838.1	11.9387	FFPE	53	1749	44587887	40994057	411190	108 bp	408172	0.9414	1749	0.9243
8	72.6	424	5.84022	FFPE	54	1627	41389410	38193581	381519	108 bp	379399	0.9396	1627	0.9229
9	65.4	866.3	13.2462	FFPE	56	2128	56621072	52050902	537239	105 bp	534050	0.877	2128	0.8992
10	64.6	841.3	13.0232	FFPE	57	1808	46661293	43106909	444317	105 bp	440764	0.9209	1808	0.9311
11	66.2	1323	19.9849	FFPE	58	3081	77305671	71399167	720293	107 bp	715849	0.9611	3081	0.9346
12	64.6	682.4	10.5635	FFPE	59	2111	53263447	49229968	503018	105 bp	499637	0.9365	2111	0.8836
13	55	1759	31.9818	FFPE	65	2125	54765611	50594398	522527	104 bp	519010	0.9206	2125	0.906
14	76.4	1032	13.5079	FFPE	67	1864	47135560	43467041	456932	103 bp	453769	0.9609	1864	0.8378
15	65.8	676.6	10.2827	FFPE	72	2136	54909419	50720677	518213	105 bp	515742	0.924	2136	0.9034
16	15.1	80.71	5.34503	FFPE	6	1102	29271915	27627054	299026	97 bp	297457	0.8645	1102	0.8726
17	26.6	125.7	4.72556	FFPE	8	1666	46520289	43960334	468864	99 bp	466405	0.8249	1666	0.9067
18	16.7	96.34	5.76886	FFPE	9	1212	32004001	30290109	323142	99 bp	321391	0.8793	1212	0.9315
19	49.2	202.1	4.10772	FFPE	15	1363	35753584	33716910	368932	96 bp	367139	0.8767	1363	0.8799
20	37.8	191.2	5.0582	FFPE	18	1622	42595646	40315316	425007	100 bp	423171	0.8849	1622	0.8954
21	59.4	380.8	6.41077	FFPE	20	1402	35197809	33167047	348550	100 bp	346959	0.9447	1402	0.8547
22	58.6	296.7	5.06314	FFPE	27	1283	32967163	31192226	332186	99 bp	330962	0.9118	1283	0.8764
23	19.2	103.9	5.41146	FFPE	28	1169	29859112	28361273	297784	100 bp	296572	0.9155	1169	0.8845
24	68.6	672.9	9.80904	FFPE	35	1775	47100399	44535931	477662	98 bp	475764	0.8744	1775	0.9089
25	79.6	911.7	11.4535	FFPE	36	2051	52587642	49818134	526794	99 bp	524508	0.9113	2051	0.8955
26	52	334.7	6.43654	FFPE	40	1739	45818877	43174616	460195	99 bp	457722	0.8876	1739	0.9507
27	74	594.9	8.03919	FFPE	42	1659	44784131	42368475	453352	98 bp	451165	0.8614	1659	0.9332
28	68.2	462.1	6.77566	FFPE	44	1425	36955077	34919305	364012	101 bp	362331	0.9112	1425	0.9329
29	78.2	652.5	8.34399	FFPE	46	1690	43261803	40709204	427718	101 bp	425798	0.9209	1690	0.9252
30	60.8	380.7	6.26151	FFPE	64	1676	43512910	40947986	434121	100 bp	432466	0.9037	1676	0.9359
31	20.6	103.16	5.00777	FFPE	71	1635	41163290	38853629	412477	99 bp	411065	0.9321	1635	0.8932
32	67.2	841.6	12.5238	FFPE	73	1590	39677431	37300041	389394	101 bp	387588	0.9558	1590	0.9222
33	40.2	192.6	4.79104	FFPE	4	1149	32296550	30565168	331475	97 bp	330066	0.8029	1149	0.8995
34	52.8	186	3.52273	FFPE	13	995.6	26060719	24778863	271939	95 bp	270869	0.8737	995.6	0.7798
35	38	157	4.13158	FFPE	17	1031	28405321	26879804	297080	95 bp	295586	0.8103	1031	0.8895
36	33.6	144.5	4.3006	FFPE	19	1517	39864756	37814206	393757	101 bp	392468	0.8762	1517	0.8901
37	57	277.7	4.87193	FFPE	26	1851	47422107	45005412	461908	102 bp	460360	0.9131	1851	0.9304
38	75.2	577.8	7.68351	FFPE	31	1126	30268292	28794175	329271	91 bp	328003	0.8429	1126	0.7261
39	59	383.2	6.49492	FFPE	34	1436	38241369	36212878	382949	99 bp	381498	0.8658	1436	0.9347
40	54.2	278.3	5.13469	FFPE	37	2530	63838230	60386097	626804	101 bp	624971	0.9261	2530	0.8878
41	73.2	475	6.48907	FFPE	43	1655	44024375	41583497	429742	102 bp	428094	0.8776	1655	0.9279
42	33.6	204.9	6.09821	FFPE	45	1691	45702246	43313549	454592	100 bp	452908	0.8483	1691	0.9146
43	51.4	320.9	6.24319	FFPE	47	1577	42021269	39903752	422864	99 bp	421228	0.8625	1577	0.9267
44	55	421.8	7.66909	FFPE	62	2783	70263646	66664061	690120	101 bp	687870	0.9295	2783	0.8938
45	42.4	437.4	10.316	FFPE	80	1455	38532998	36526220	382367	100 bp	381056	0.8742	1455	0.8835
46	52.4	424.4	8.09924	FFPE	92	1208	32179908	30381867	332578	96 bp	331332	0.8471	1208	0.8367
47	43.4	345.5	7.96083	FFPE	95	1172	30731236	29082091	308710	99 bp	307516	0.8747	1172	0.9086
48	49.4	439.1	8.88866	FFPE	96	1362	37064783	35249528	375496	98 bp	373738	0.8429	1362	0.9318
49	15.2	110.7	7.28289	FFPE	10	1032	31631643	30056310	355705	88 bp	351585	0.6985	1032	0.785
50	14.6	107.8	7.38356	FFPE	16	1133	36234133	34449700	411761	87 bp	409100	0.6555	1133	0.8688
51	43.4	205.7	4.73963	FFPE	21	946.5	28487958	27126149	324629	87 bp	323152	0.7292	946.5	0.6921
52	19	121.2	6.37895	FFPE	22	1079	30525097	28995604	337216	90 bp	335752	0.7852	1079	0.7162
53	20	113.8	5.69	FFPE	23	1582	44724762	42546491	483010	92 bp	480980	0.7934	1582	0.7647
54	50	353.5	7.07	FFPE	52	1147	35751454	33934191	399256	89 bp	396838	0.6867	1147	0.8454
55	57.4	743.7	12.9564	FFPE	66	1266	35409326	33571073	384491	92 bp	382877	0.8004	1266	0.7191
56	22	127.4	5.79091	FFPE	74	1448	37334420	35521754	381953	97 bp	380685	0.9036	1448	0.7439
57	33.6	171.1	5.09226	FFPE	79	1568	42019889	39818782	448766	93 bp	446856	0.8552	1568	0.7184
58	47.2	499.5	10.5826	FFPE	81	1256	34868303	33025457	370444	94 bp	368697	0.8068	1256	0.8899
59	46.6	347.1	7.4485	FFPE	83	691.6	22827934	21606831	268199	85 bp	266972	0.6557	691.6	0.6305
60	14.4	134.8	9.36111	FFPE	84	1669	46704319	44277420	505528	92 bp	501944	0.7904	1669	0.9079
61	6.84	91.13	13.3231	FFPE	85	858.9	25121457	23735217	280467	89 bp	278391	0.7399	858.9	0.8814
62	44.8	346.7	7.73884	FFPE	86	702.6	23909535	22782913	290676	82 bp	289054	0.6143	702.6	0.5897
63	42.4	311.6	7.34906	FFPE	89	1713	45554603	43207098	465563	97 bp	463558	0.854	1713	0.8629
64	17.5	130.2	7.44	FFPE	94	1831	48997372	46510360	497509	98 bp	495376	0.8444	1831	0.825
65	38.2	247.1	6.46859	FFPE	12	1394	46025894	43696661	550892	83 bp	547101	0.6019	1394	0.7316
66	76.8	983.7	12.8086	FFPE	48	2941	79021085	74571847	783687	100 bp	779533	0.8632	2941	0.9359
67	34.6	264.5	7.64451	FFPE	55	734	23274726	22003751	268209	86 bp	266622	0.6635	734	0.8056
68	36.4	227	6.23626	FFPE	61	1819	51624949	48796435	559697	92 bp	557258	0.7811	1819	0.6983
69	54.4	459.4	8.44485	FFPE	63	1025	28527922	26895827	310432	91 bp	309101	0.8018	1025	0.7029
70	4.12	24.57	5.96359	FFPE	68	613	21698168	20609075	284534	76 bp	282808	0.5592	613	0.4998
71	13.9	102.48	7.37266	FFPE	75	1123	35615128	33773873	428196	83 bp	425816	0.6776	1123	0.7241
72	12.7	84.7	6.66929	FFPE	76	705.4	22876484	21565398	251379	91 bp	250277	0.6974	705.4	0.7018
73	9.82	103.93	10.5835	FFPE	77	1131	34202649	32385233	402159	85 bp	400245	0.7048	1131	0.5375
74	12.4	84.08	6.78065	FFPE	2	1169	33258795	31624306	344227	96 bp	341423	0.7884	1169	0.8838
75	17.4	87.52	5.02989	FFPE	3	1345	37440565	35576499	386290	96 bp	384592	0.8052	1345	0.8693
76	62	399.9	6.45	FFPE	5	1365	39447254	37412737	420265	93 bp	418467	0.7627	1365	0.8537
77	15.7	104.3	6.64331	FFPE	7	1331	38713736	36791354	417591	92 bp	415670	0.7478	1331	0.8615
78	32.2	154	4.78261	FFPE	14	1355	36759775	34975249	378130	97 bp	376814	0.8329	1355	0.8483
79	45.4	228	5.02203	FFPE	24	1292	35581627	33819482	367166	96 bp	365832	0.8195	1292	0.8886
80	49.6	250.2	5.04435	FFPE	25	1574	42605134	40300242	434322	98 bp	432616	0.8447	1574	0.9178
81	43.4	247.4	5.70046	FFPE	30	1169	32226800	30654171	345071	93 bp	344020	0.83	1169	0.7346
82	64.6	442.3	6.84675	FFPE	38	1532	40138175	38143654	402782	99 bp	401644	0.8808	1532	0.8552
83	49.4	312.8	6.33198	FFPE	41	1015	32226662	30596732	351066	91 bp	349480	0.6796	1015	0.9398
84	56.4	507.9	9.00532	FFPE	49	1397	39627420	37589564	417163	94 bp	415377	0.7916	1397	0.9147
85	32.6	177.7	5.45092	FFPE	60	1490	39227644	36969124	395934	99 bp	394558	0.8796	1490	0.8935
86	4.62	39.57	8.56494	FFPE	70	1089	29730927	28092327	318524	93 bp	316950	0.817	1089	0.8272
87	34.8	196.6	5.64943	FFPE	88	1174	33011175	31230475	340893	96 bp	339535	0.7989	1174	0.8663
88	31.8	191.6	6.02516	FFPE	90	1375	35892426	34023305	364455	98 bp	363314	0.8828	1375	0.8298
89	46.8	292.4	6.24786	FFPE	91	1227	32744641	31078090	332377	98 bp	331164	0.8613	1227	0.8676
